# Supplementary material
Source: Springer Nature journal article supplement (https://www.springermedizin.de/resource/supplementary/12911_2012_628_MOESM3_ESM.pdf/9525922)

**A**

Maximum Rsquared

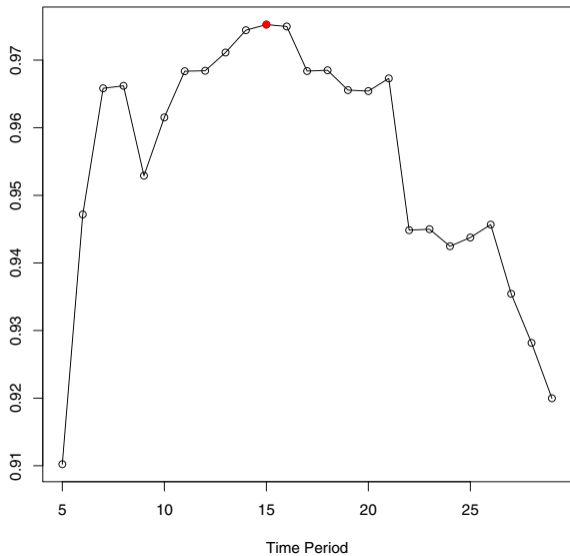**B**

End date (index)

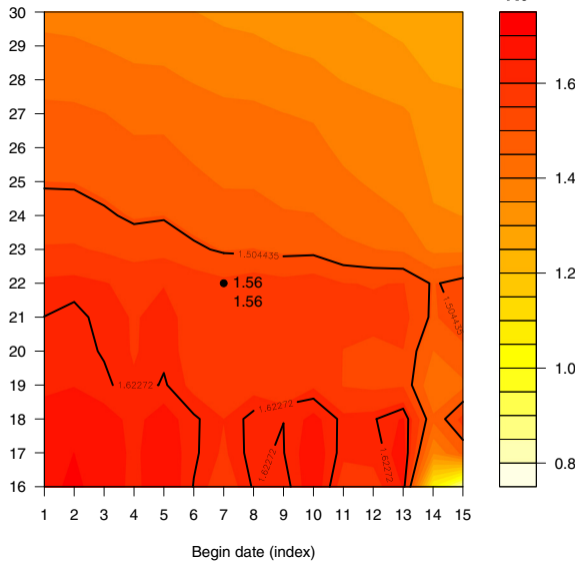

Supplement: MOESM3 [file 9525922]
